# Supplementary material for: Continuous-flow synthesis of CsPbI3/TiO2 nanocomposites with enhanced water and thermal stability
Source: Royal Society of Chemistry journal article supplement (doi:10.1039/d4dt01763c), 2024-01-01
Supplement: d4dt01763c1.pdf [file d4dt01763c1.pdf]

## Electronic Supplementary Information

### Continuous-flow synthesis of CsPbI<sub>3</sub>/TiO<sub>2</sub> nanocomposites with enhanced water and thermal stability

Jingshan Hou,\*<sup>a</sup> Jiafeng Hu,<sup>a</sup> Jianghua Wu,<sup>a</sup> Qing Zhang,<sup>a</sup> Zhifu Liu,<sup>a</sup> Langping Dong,<sup>a</sup> Guangxiang Jiang,<sup>a</sup> Yufeng Liu,<sup>a</sup> Wei Gao\*<sup>a</sup> and Yongzheng Fang\*<sup>a</sup>

<sup>a</sup> School of Materials Science and Engineering, Shanghai Institute of Technology, Shanghai, 201418, China

#### Experimental details

##### Precursor preparation

Precursor 1 (Cs-oleate): 2.5 mmol of Cs<sub>2</sub>CO<sub>3</sub>, 2.5 mL of OA and 40 mL of ODE were loaded into a 3-necked flask of 100 mL, dried for 1 h at 120 °C under N<sub>2</sub>, and then heated to 150 °C until all Cs<sub>2</sub>CO<sub>3</sub> reacted with OA. Because Cs-oleate precipitates from ODE at room temperature, the Cs-oleate solution needs to be preheated to 120 °C before injection. The oleic acid Cs-oleate precursor was diluted with ODE at a volume ratio of 1:20 and rapidly stirred for 10 min at 120 °C, until the solution was clear, then the 10 mL solution was loaded into a 10 ml closed syringe for subsequent microfluidic synthesis.

Precursor 2 (PbI<sub>2</sub>): 1.88 mmol of PbI<sub>2</sub>, 5 mL of OA, 5 mL of OAm, and 50 mL of ODE were loaded into a three-necked flask of 100 mL, and the mixed solution was magnetically stirred at 120 °C under N<sub>2</sub> for 0.5 min, until the solution was clear, then the 10 mL solution was loaded into a 10 ml closed syringe for subsequent microfluidic synthesis.

Precursor 3 (PbI<sub>2</sub>/TiO<sub>2</sub>): 1.88 mmol of PbI<sub>2</sub>, 0.5 g TiO<sub>2</sub>, 5 mL of OA, 5 mL of OLA, and 50 mL of ODE were loaded into a three-necked flask of 100 mL, and the mixed solution was magnetically stirred at 120 °C under N<sub>2</sub> for 0.5 min, until PbI<sub>2</sub> completely reacted with OA and OAm and TiO<sub>2</sub> was uniformly dispersed in the solvent, then the 10 mL solution was loaded into a 10 ml closed syringe for subsequent microfluidic synthesis.

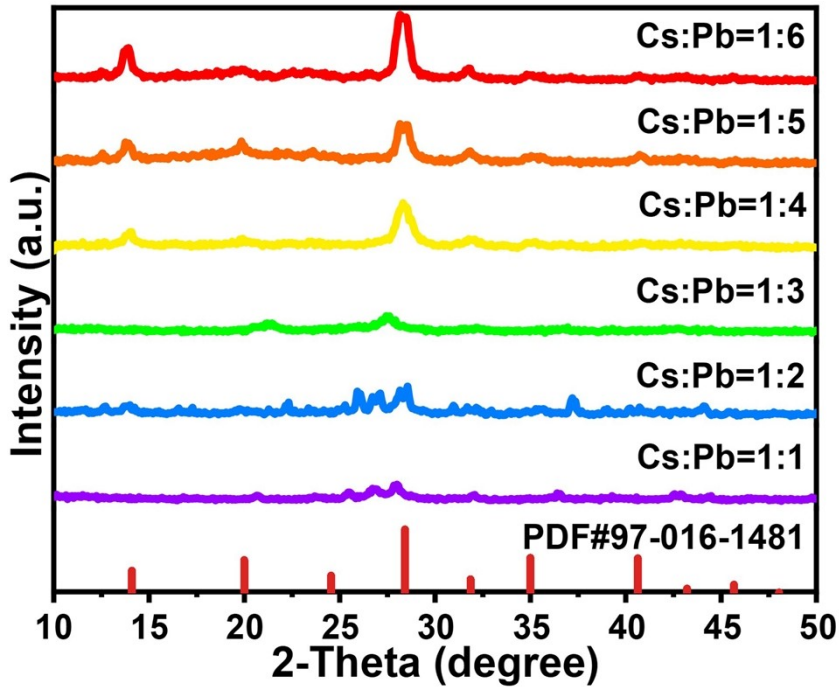

Fig. S1 XRD pattern of CsPbI<sub>3</sub> with different Cs and Pb ratios.

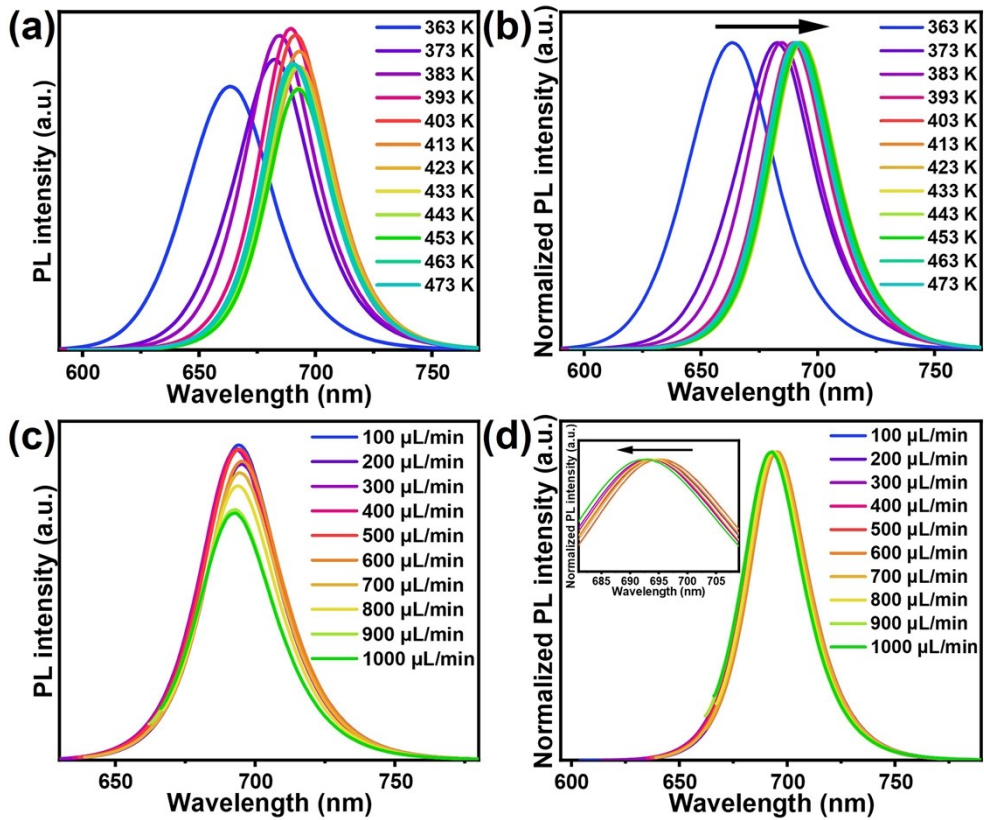

Fig. S2 PL spectra of CsPbI<sub>3</sub> nanocrystals prepared by microfluidic method at different temperatures (a and b) and different flow rates (c and d).

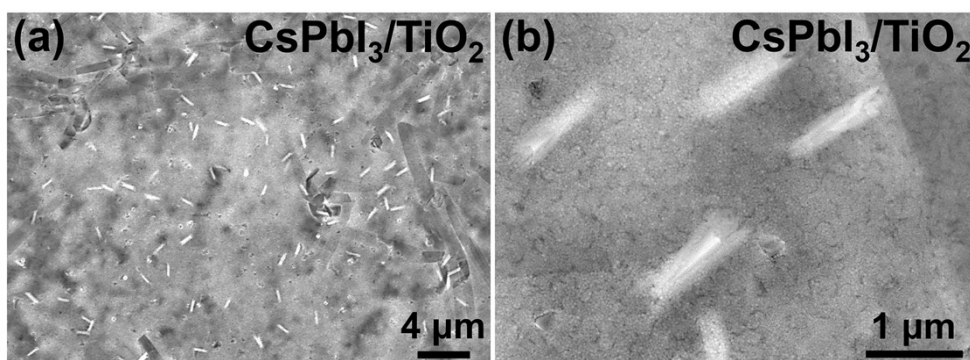

Fig. S3 SEM image of the CsPbI<sub>3</sub>/TiO<sub>2</sub> nanocomposites.

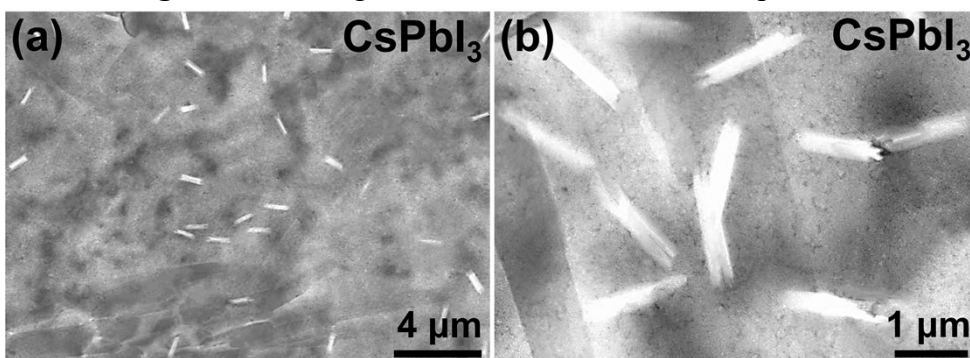

Fig. S4 SEM image of the CsPbI<sub>3</sub> nanorods.

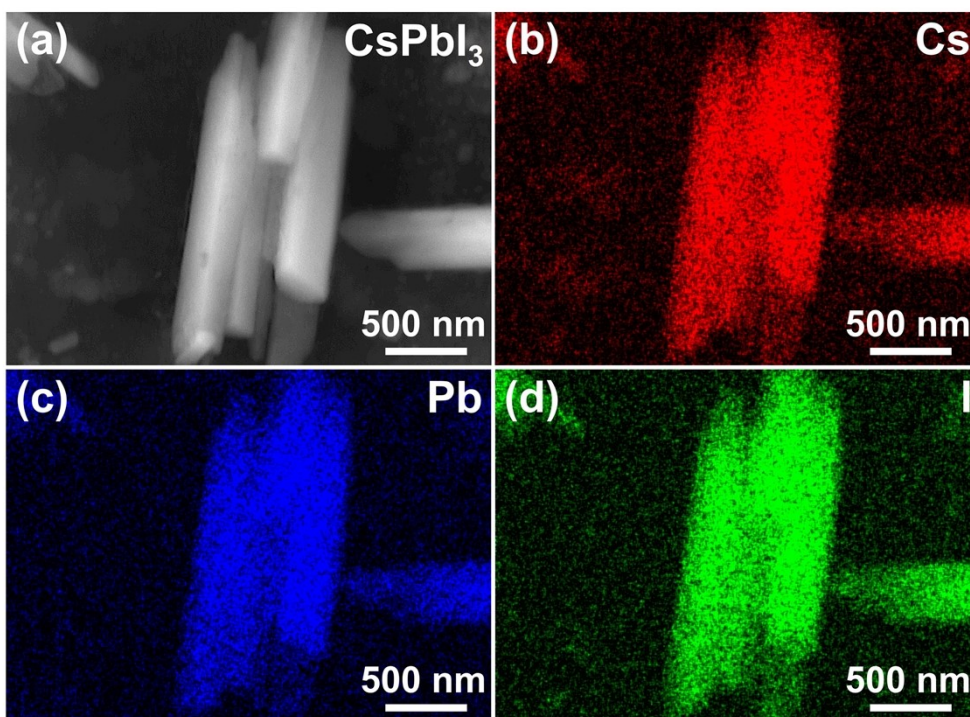

Fig. S5 (a) SEM image of the CsPbI<sub>3</sub> nanorods. (b, c and d) Elemental mapping images of Cs, Pb and I in CsPbI<sub>3</sub> nanorods.

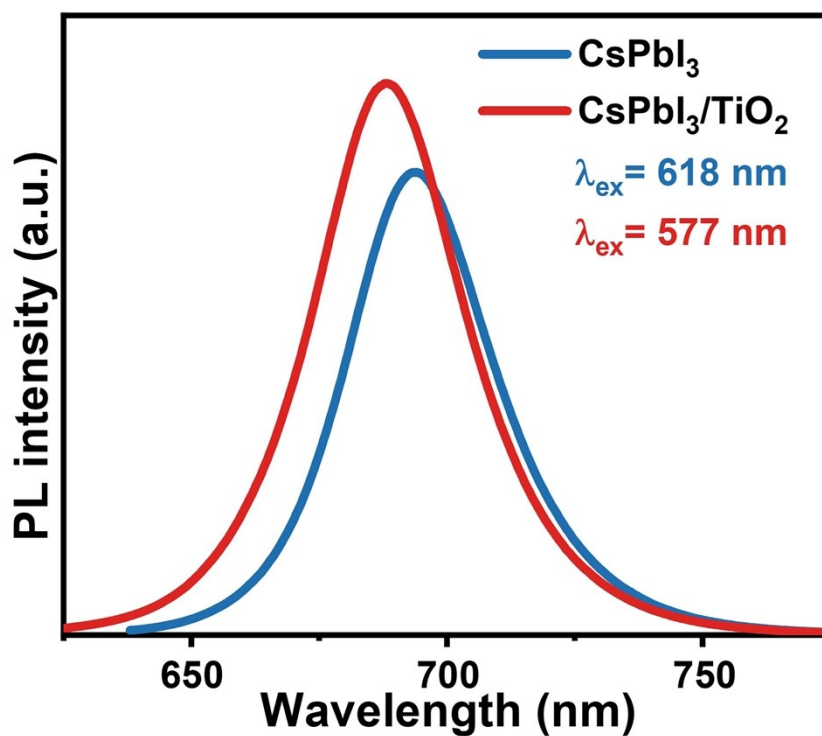

**Fig. S6** PL intensity of CsPbI<sub>3</sub> nanorods and CsPbI<sub>3</sub>/TiO<sub>2</sub> nanocomposites excited by 618 nm and 577 nm, respectively.

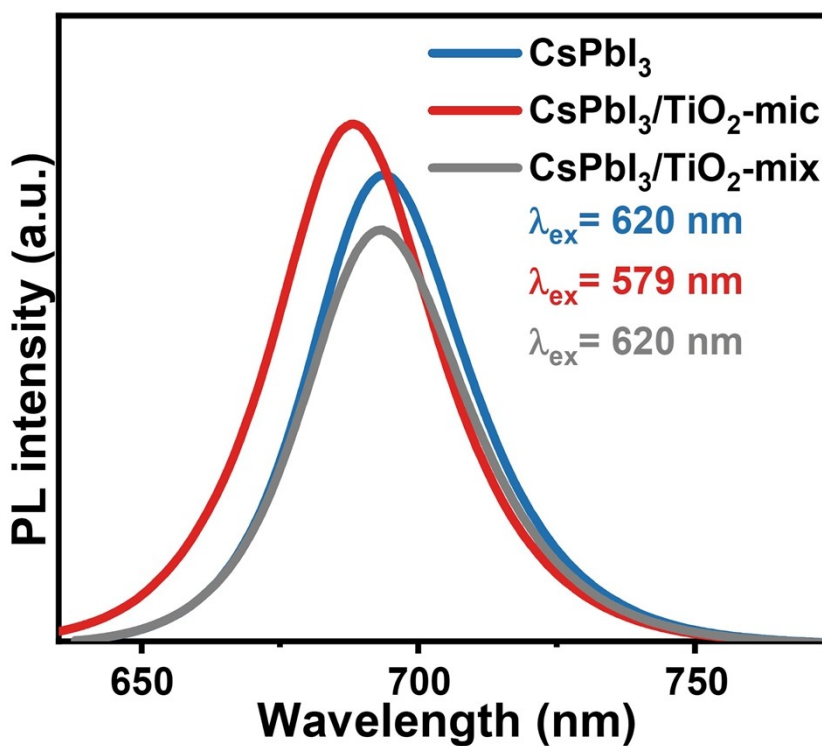

**Fig. S7** PL spectra of CsPbI<sub>3</sub> nanorods (blue lines), CsPbI<sub>3</sub>/TiO<sub>2</sub> nanocomposites prepared by microfluidic method (CsPbI<sub>3</sub>/TiO<sub>2</sub>-mic) (red lines) and composites directly mixed with CsPbI<sub>3</sub> nanorods and TiO<sub>2</sub> (CsPbI<sub>3</sub>/TiO<sub>2</sub>-mix) (gray lines).

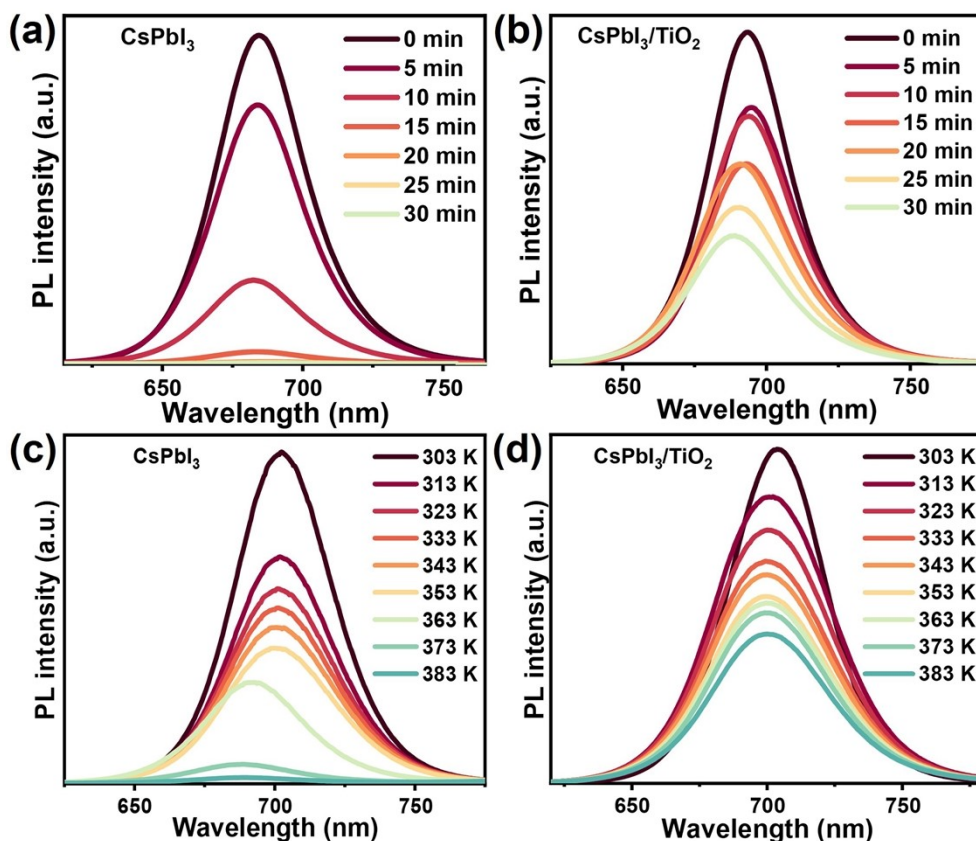

**Fig. S8** (a) and (b) Water stability dependent PL spectra of CsPbI<sub>3</sub> nanorods and CsPbI<sub>3</sub>/TiO<sub>2</sub> nanocomposites, (c) and (d) Temperature-dependent PL spectra of CsPbI<sub>3</sub> nanorods and CsPbI<sub>3</sub>/TiO<sub>2</sub> nanocomposites.

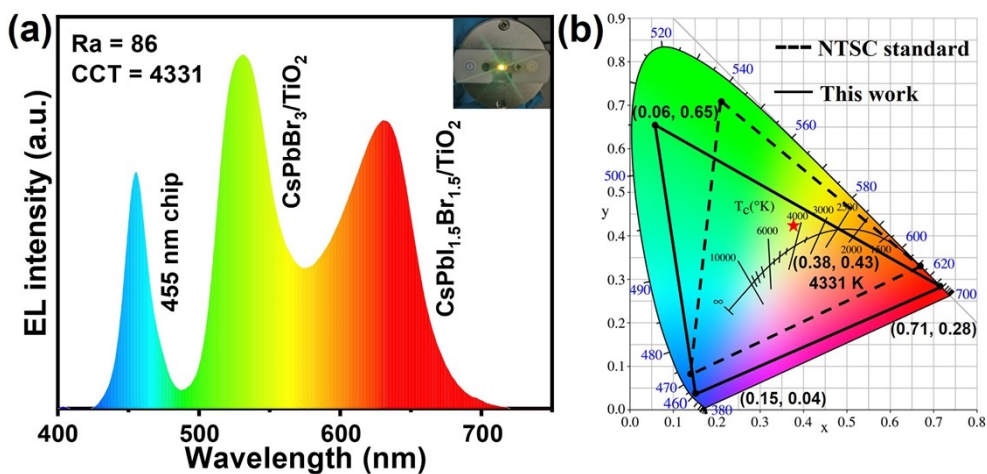

**Fig. S9** (a) Emission spectra and corresponding photograph of the white CsPbX<sub>3</sub>/TiO<sub>2</sub> LED at a driving current of 10 mA. (b) CIE color coordinates of the blue chip, green CsPbBr<sub>3</sub>/TiO<sub>2</sub> nanocomposites, red CsPbI<sub>1.5</sub>Br<sub>1.5</sub>/TiO<sub>2</sub> nanocomposites, and the fabricated LED.

**Table S1.** PL lifetime for CsPbI<sub>3</sub> nanocrystals and CsPbI<sub>3</sub>/TiO<sub>2</sub> nanocomposites. The PL lifetime is fitted by a biexponential decay function.

| Material                             | $A_1$ | $A_2$ | $\tau_1$ | $\tau_2$ | Time (ns) |
|--------------------------------------|-------|-------|----------|----------|-----------|
| CsPbI <sub>3</sub>                   | 0.49  | 0.45  | 22.94    | 124.83   | 107.7     |
| CsPbI <sub>3</sub> /TiO <sub>2</sub> | 0.51  | 0.45  | 22.68    | 110.26   | 93.6      |
